# Supplementary material for: Evolutionarily distinct strategies for the acquisition of inorganic carbon from seawater in marine diatoms
Source: PubMed Central journal article supplement (PMC5853789; doi:10.1093/jxb/erx102), 2017-04-08
Supplement: erx102_suppl_supplementary_tables_s1_s3.pdf [file erx102_suppl_supplementary_tables_s1_s3.pdf]

## Supplemental data (Tables S1-S3)

**Table S1** Effects of DIDS and AZA on photosynthetic parameters of four diatoms. <sup>a</sup>1% (v/v, final conc.) DMSO was added as a mock treatment. <sup>b</sup>1% (v/v, final conc.) EtOH was added as a mock treatment. Values represent means  $\pm$  SD of three or four biological replicates.

| Species               | Treatment |                              | Photosynthetic parameters      |                                                                                             |
|-----------------------|-----------|------------------------------|--------------------------------|---------------------------------------------------------------------------------------------|
|                       | inhibitor | concentration                | $K_{0.5}$<br>( $\mu\text{M}$ ) | $P_{\text{max}}$<br>( $\mu\text{mol O}_2 \text{ mg}^{-1} \text{ Chl } a \text{ min}^{-1}$ ) |
| <i>P. tricornutum</i> | DIDS      | 0 mM <sup>a</sup>            | 35 $\pm$ 12                    | 195 $\pm$ 29                                                                                |
|                       |           | 0.5 mM                       | 69 $\pm$ 21                    | 190 $\pm$ 28                                                                                |
|                       |           | 1 mM                         | 80 $\pm$ 11                    | 159 $\pm$ 10                                                                                |
|                       |           | 2.5 mM                       | 112 $\pm$ 11                   | 167 $\pm$ 17                                                                                |
|                       | AZA       | 0 $\mu\text{M}$ <sup>b</sup> | 38 $\pm$ 8                     | 188 $\pm$ 11                                                                                |
|                       |           | 50 $\mu\text{M}$             | 30 $\pm$ 11                    | 163 $\pm$ 3                                                                                 |
|                       |           | 100 $\mu\text{M}$            | 36 $\pm$ 6                     | 167 $\pm$ 11                                                                                |
| <i>C. fusiformis</i>  | DIDS      | 0 mM <sup>a</sup>            | 93 $\pm$ 17                    | 162 $\pm$ 17                                                                                |
|                       |           | 1 mM                         | 73 $\pm$ 9                     | 171 $\pm$ 19                                                                                |
|                       |           | 2 mM                         | 64 $\pm$ 11                    | 164 $\pm$ 3                                                                                 |
|                       | AZA       | 0 $\mu\text{M}$ <sup>b</sup> | 147 $\pm$ 33                   | 197 $\pm$ 31                                                                                |
|                       |           | 50 $\mu\text{M}$             | 245 $\pm$ 24                   | 212 $\pm$ 19                                                                                |
| <i>T. pseudonana</i>  | DIDS      | 0 mM <sup>a</sup>            | 98 $\pm$ 34                    | 250 $\pm$ 46                                                                                |
|                       |           | 0.5 mM                       | 65 $\pm$ 23                    | 230 $\pm$ 52                                                                                |
|                       |           | 1 mM                         | 65 $\pm$ 26                    | 205 $\pm$ 28                                                                                |
|                       |           | 2 mM                         | 43 $\pm$ 11                    | 183 $\pm$ 33                                                                                |
|                       | AZA       | 0 $\mu\text{M}$ <sup>b</sup> | 146 $\pm$ 70                   | 257 $\pm$ 56                                                                                |
|                       |           | 25 $\mu\text{M}$             | 411 $\pm$ 175                  | 255 $\pm$ 24                                                                                |
|                       |           | 50 $\mu\text{M}$             | 645 $\pm$ 90                   | 290 $\pm$ 51                                                                                |
| <i>C. muelleri</i>    | DIDS      | 0 mM <sup>a</sup>            | 50 $\pm$ 10                    | 224 $\pm$ 19                                                                                |
|                       |           | 0.5 mM                       | 93 $\pm$ 13                    | 230 $\pm$ 25                                                                                |
|                       |           | 1 mM                         | 104 $\pm$ 18                   | 223 $\pm$ 19                                                                                |
|                       |           | 2 mM                         | 129 $\pm$ 21                   | 223 $\pm$ 15                                                                                |
|                       | AZA       | 0 $\mu\text{M}$ <sup>b</sup> | 46 $\pm$ 20                    | 248 $\pm$ 41                                                                                |
|                       |           | 50 $\mu\text{M}$             | 53 $\pm$ 17                    | 245 $\pm$ 57                                                                                |
|                       |           | 100 $\mu\text{M}$            | 40 $\pm$ 14                    | 234 $\pm$ 53                                                                                |
|                       |           | 150 $\mu\text{M}$            | 48 $\pm$ 18                    | 229 $\pm$ 56                                                                                |

**Table S2** Qualitative summary of effects of inhibitors on photosynthetic parameters.

↑, increased; ↓, decreased; →, unchanged; n.d., not determined.

| Group   | Species               | Effects of DIDS on |                    |                  |                  | Effects of AZA on |                    |                  |                  |
|---------|-----------------------|--------------------|--------------------|------------------|------------------|-------------------|--------------------|------------------|------------------|
|         |                       | APC                | CO <sub>2</sub> CP | K <sub>0.5</sub> | P <sub>max</sub> | APC               | CO <sub>2</sub> CP | K <sub>0.5</sub> | P <sub>max</sub> |
| Pennate | <i>P. tricornutum</i> | ↓                  | →                  | ↑                | →                | →                 | n.d.               | →                | →                |
|         | <i>C. fusiformis</i>  | →                  | →                  | →                | →                | ↓                 | n.d.               | ↑                | →                |
| Centric | <i>T. pseudonana</i>  | →                  | →                  | →                | →                | ↓                 | n.d.               | ↑                | →                |
|         | <i>C. muelleri</i>    | ↓                  | ↑                  | ↑                | →                | →                 | n.d.               | →                | →                |

**Table S3** Predicted localization of putative SLC4s in *T. pseudonana*. Protein ID in JGI database and accession no. in GenBank database was shown with predicted localization. For the prediction of localization, HECTAR was used (Gschloessl et al. 2008). Since the N-terminal of TpSLC4-1 is not started from Met probably due to incompleteness of databases, we cannot predict its localization.

| Name     | Protein ID | GenBank accession no. | Predicted localization |
|----------|------------|-----------------------|------------------------|
| TpSLC4-1 | 23678      | XP_002291948          | ?                      |
| TpSLC4-2 | 270240     | XP_002286207          | Chloroplast            |
| TpSLC4-3 | 270361     | XP_002286696          | Chloroplast            |

### Reference

**Gschloessl B, Guerneur Y, Cock JM.** 2008. HECTAR: A method to predict subcellular targeting in heterokonts. *BMC Bioinformatics* **9**, 393
